# Supplementary material
Source: publisher site journal article supplement (https://www.spandidos-publications.com/8236/downloadSupplementary)
Supplement: Supplementary file 1 [file downloadSupplementary]

**Table SI.** Antibodies for immunofluorescence staining and western blotting.

| Antibodies     | Supplier                               | Cat. no.   | Dilution |
|----------------|----------------------------------------|------------|----------|
| UNC5B          | Cell Signaling Technology, Inc.        | 13851      | 1:1,000  |
| $\beta$ -actin | Zen Bioscience Ltd.                    | 380624     | 1:1,000  |
| ZO-1           | Cell Signaling Technology, Inc.        | 13663      | 1:1,000  |
| Occludin       | Cell Signaling Technology, Inc.        | 91131      | 1:1,000  |
| PLVAP          | Thermo Fisher Scientific, Inc.         | PA5-115774 | 1:1,000  |
| Caveolin-1     | Cell Signaling Technology, Inc.        | 3238       | 1:1,000  |
| NG2            | Santa Cruz Biotechnology, Inc.         | sc-53389   | 1:200    |
| NEUN           | Abcam                                  | ab177487   | 1:500    |
| TUBB3          | Abcam                                  | ab18207    | 1:500    |
| Vimentin       | Abcam                                  | ab92547    | 1:500    |
| Collagen IV    | Hangzhou HuaAn Biotechnology Co., Ltd. | HA500197   | 1:1,000  |
| Fibronectin    | Hangzhou HuaAn Biotechnology Co., Ltd. | ET1702-25  | 1:1,000  |
| Laminin        | Hangzhou HuaAn Biotechnology Co., Ltd. | ET1703-14  | 1:2,000  |
| p-MST          | Hangzhou HuaAn Biotechnology Co., Ltd. | HA721737   | 1:1,000  |

|                                                                                |                                        |           |          |
|--------------------------------------------------------------------------------|----------------------------------------|-----------|----------|
| MST                                                                            | Hangzhou HuaAn Biotechnology Co., Ltd. | HA500043  | 1:1,000  |
| YAP                                                                            | Hangzhou HuaAn Biotechnology Co., Ltd. | ET1608-30 | 1:1,000  |
| TAZ                                                                            | Hangzhou HuaAn Biotechnology Co., Ltd. | HA500300  | 1:1,000  |
| Histone H3                                                                     | Hangzhou HuaAn Biotechnology Co., Ltd. | M1309-1   | 1:10,000 |
| Goat anti-Rabbit IgG (H+L) Cross-Adsorbed Secondary Antibody (Alexa Fluor 488) | Thermo Fisher Scientific, Inc.         | A-11008   | 1:500    |
| Goat anti-Mouse IgG (H+L) Cross-Adsorbed Secondary Antibody (Alexa Fluor 594)  | Thermo Fisher Scientific, Inc.         | A-11005   | 1:500    |
| HRP-labeled Mouse Anti-Native Rabbit IgG (H+L)                                 | Beyotime Biotechnology                 | A0210     | 1:1,000  |
| HRP-labeled Rat Anti-Native Mouse IgG (H+L)                                    | Beyotime Biotechnology                 | A0218     | 1:1,000  |

UNC5B, unc-5 netrin receptor B; ZO-1, zonula occludens-1; PLVAP, plasmalemma vesicle associated protein; IB4, isolectin B4; NG2, neuron-gial antigen 2; NEUN, neuron-specific nuclear protein; TUBB3, class III  $\beta$ -tubulin; MST, mammalian Ste20-like kinase; YAP, yes-associated protein; TAZ, transcriptional co-activator with PDZ-binding motif; p-, phosphorylated.

**Table SII.** Primer sequences for reverse transcription-quantitative PCR.

| Gene           | Species | Forward primer (5'-3') | Reverse primer (5'-3') |
|----------------|---------|------------------------|------------------------|
| UNC5B          | Mouse   | CGGGACGCTACTTGACTCC    | GGTGGCTTTTAGGGTCGTTTAG |
| UNC5B          | Human   | GTCGGACACTGCCAACTATAC  | CCGCCATTCACGTAGACGAT   |
| ZO-1           | Human   | CAACATACAGTGACGCTTCACA | CACTATTGACGTTTCCCCACTC |
| Occludin       | Human   | ACAAGCGGTTTTATCCAGAGTC | GTCATCCACAGGCGAAGTTAAT |
| Claudin-5      | Human   | CTCTGCTGGTTCGCCAACAT   | CAGCTCGTACTTCTGCGACA   |
| Caveolin-1     | Human   | GCGACCCTAAACACCTCAAC   | ATGCCGTCAAAACTGTGTGTC  |
| $\beta$ -actin | Mouse   | GGCTGTATTCCCCTCCATCG   | CCAGTTGGTAACAATGCCATGT |
| $\beta$ -actin | Human   | CATGTACGTTGCTATCCAGGC  | CTCCTTAATGTCACGCACGAT  |

UNC5B, unc-5 netrin receptor B; ZO-1, zonula occludens-1.
